# Supplementary material
Source: Springer Nature journal article supplement (https://www.springermedizin.de/resource/supplementary/13058_2005_1349_MOESM11_ESM.pdf/9698916)

# S-11: 20q Multiple Alignment

+/- 1.0 scale bars are included for reference

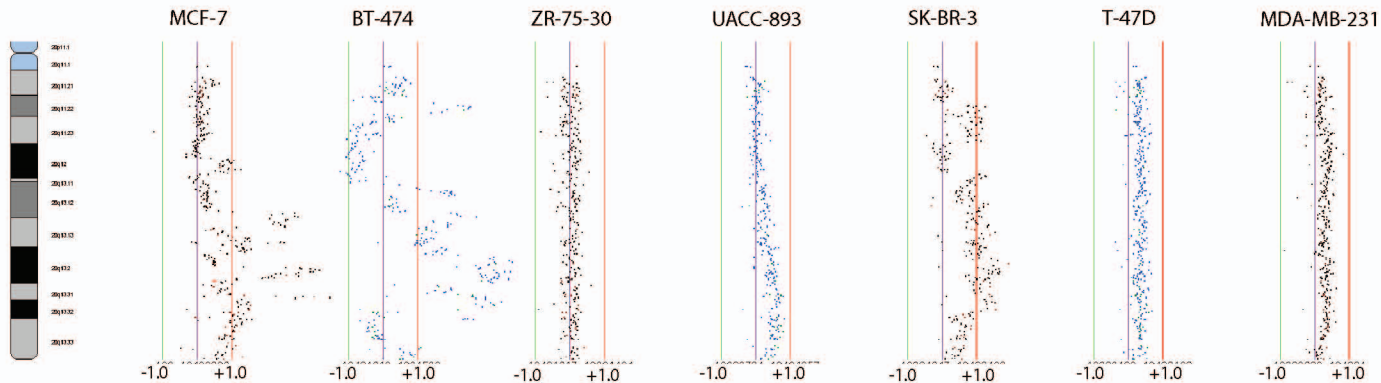

Supplement: MOESM11 [file 9698916]
